# Supplementary material
Source: PubMed Central journal article supplement (PMC6156650)
Supplement: pnas.1807912115.sapp.pdf [file pnas.1807912115.sapp.pdf]

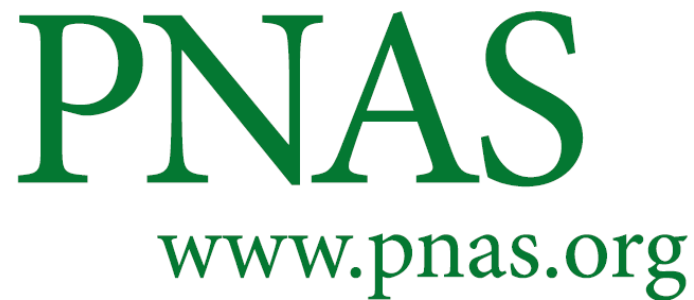

Supplementary Information for:

## Striking stationarity of large-scale climate model bias patterns under strong climate change

Gerhard Krinner<sup>1</sup> and Mark G. Flanner<sup>2</sup>

<sup>1</sup> CNRS, Université Grenoble Alpes, Institut des Géosciences de l'Environnement (IGE), 38000 Grenoble, France.

<sup>2</sup> Department of Climate and Space Sciences and Engineering, University of Michigan, Ann Arbor Michigan 48109, USA

Corresponding author:

Gerhard Krinner

Email: [gerhard.krinner@cnrs.fr](mailto:gerhard.krinner@cnrs.fr)

**This PDF file includes:**

Figs. S1 to S14

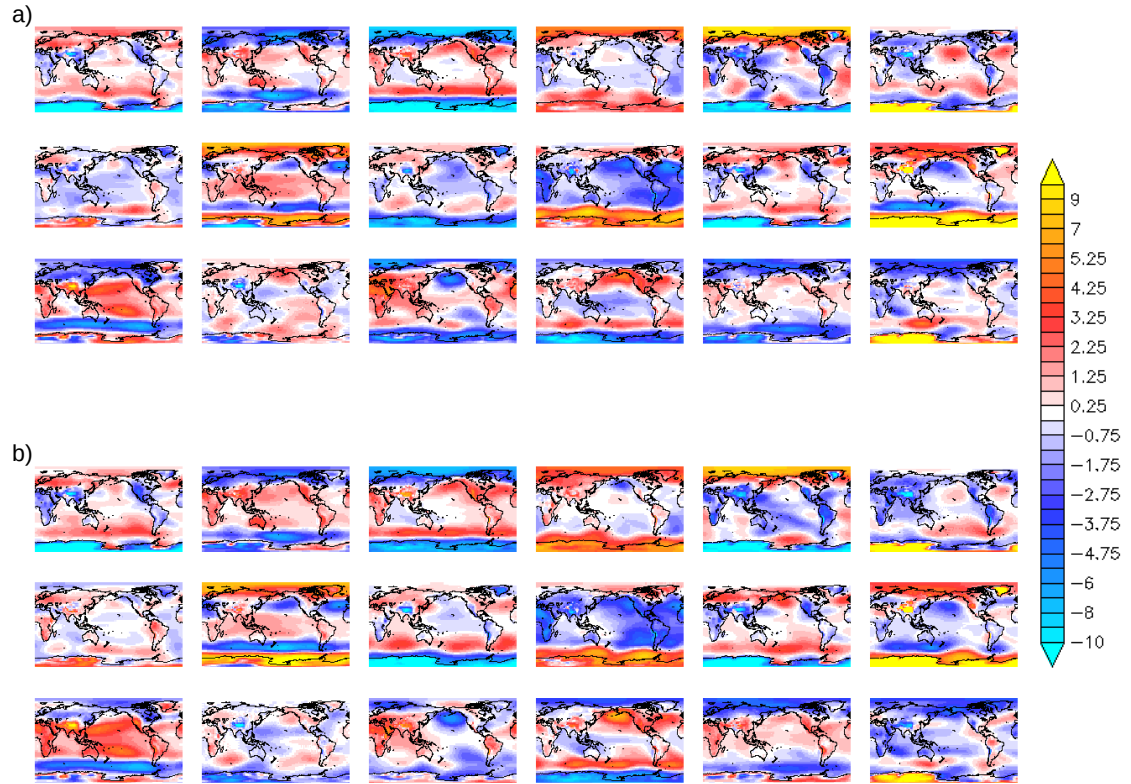

**Fig. S1.** Sea-level pressure error patterns (hPa) with respect to the ensemble mean for the individual models. a) piControl; b) abrupt4xCO<sub>2</sub>. The color scale is the same for all models and both experiments. Models are ordered from left to right and from top to bottom (model #1 at top left, model #6 at top right, model #18 at bottom right; model numbers as in Figure 1).

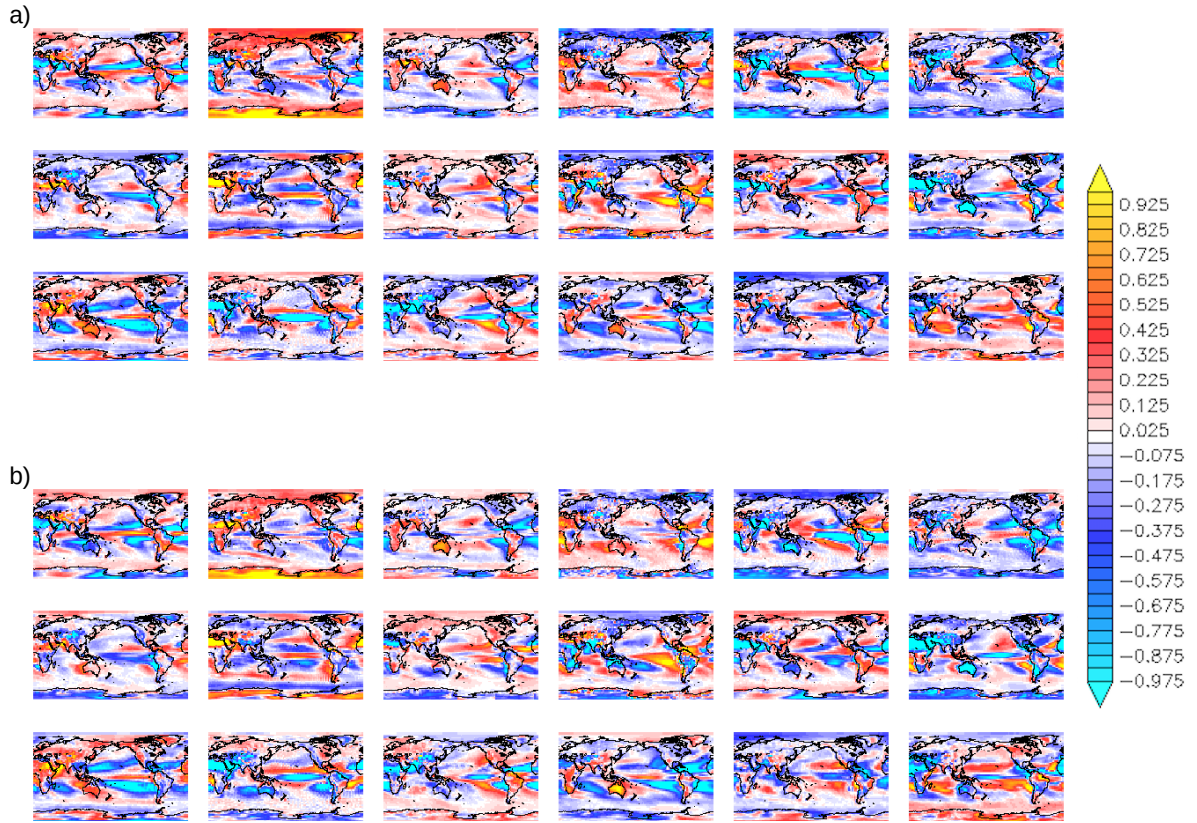

**Fig. S2.** Precipitation error patterns (dimensionless) with respect to the ensemble mean for the individual models. a) piControl; b) abrupt4xCO<sub>2</sub>. The color scale is the same for all models and both experiments. Models are ordered from left to right and from top to bottom (model #1 at top left, model #6 at top right, model #18 at bottom right; model numbers as in Figure 1).

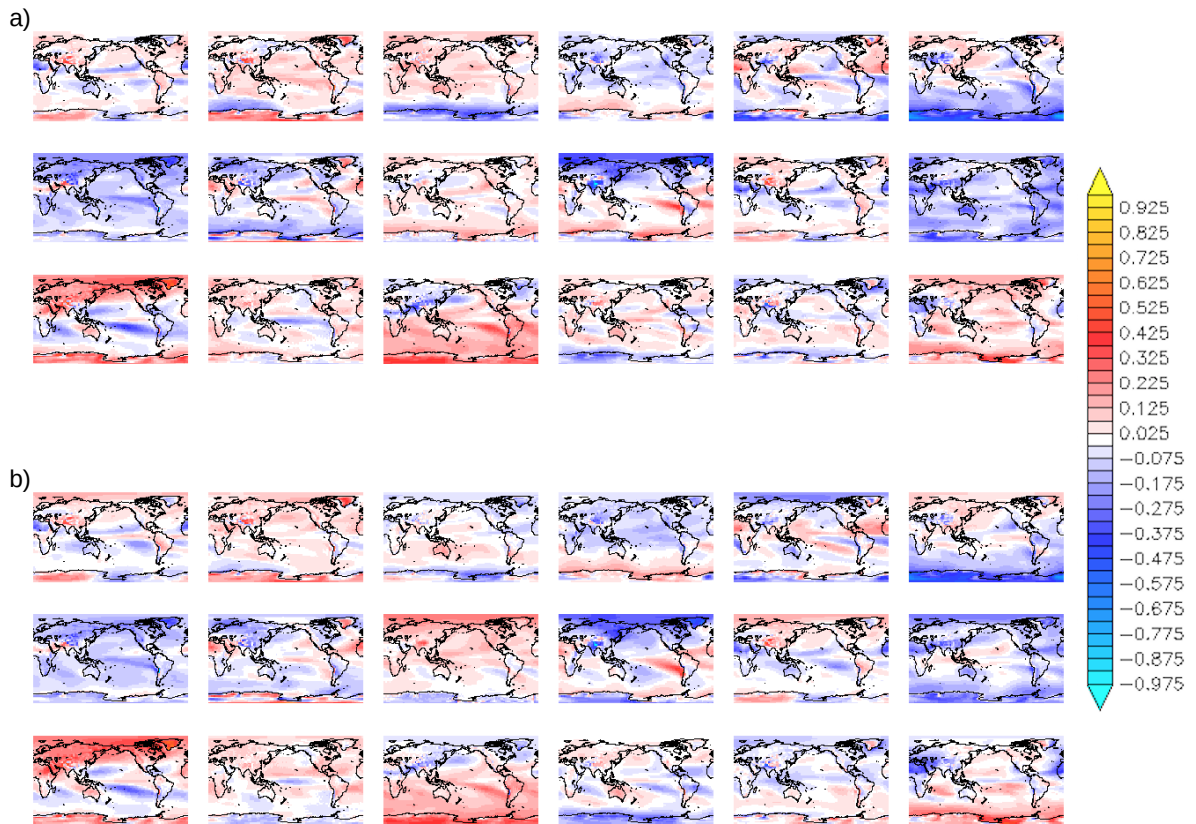

**Fig. S3.** Precipitable water error patterns (dimensionless) with respect to the ensemble mean for the individual models. a) piControl; b) abrupt4xCO<sub>2</sub>. The color scale is the same for all models and both experiments. Models are ordered from left to right and from top to bottom (model #1 at top left, model #6 at top right, model #18 at bottom right; model numbers as in Figure 1).

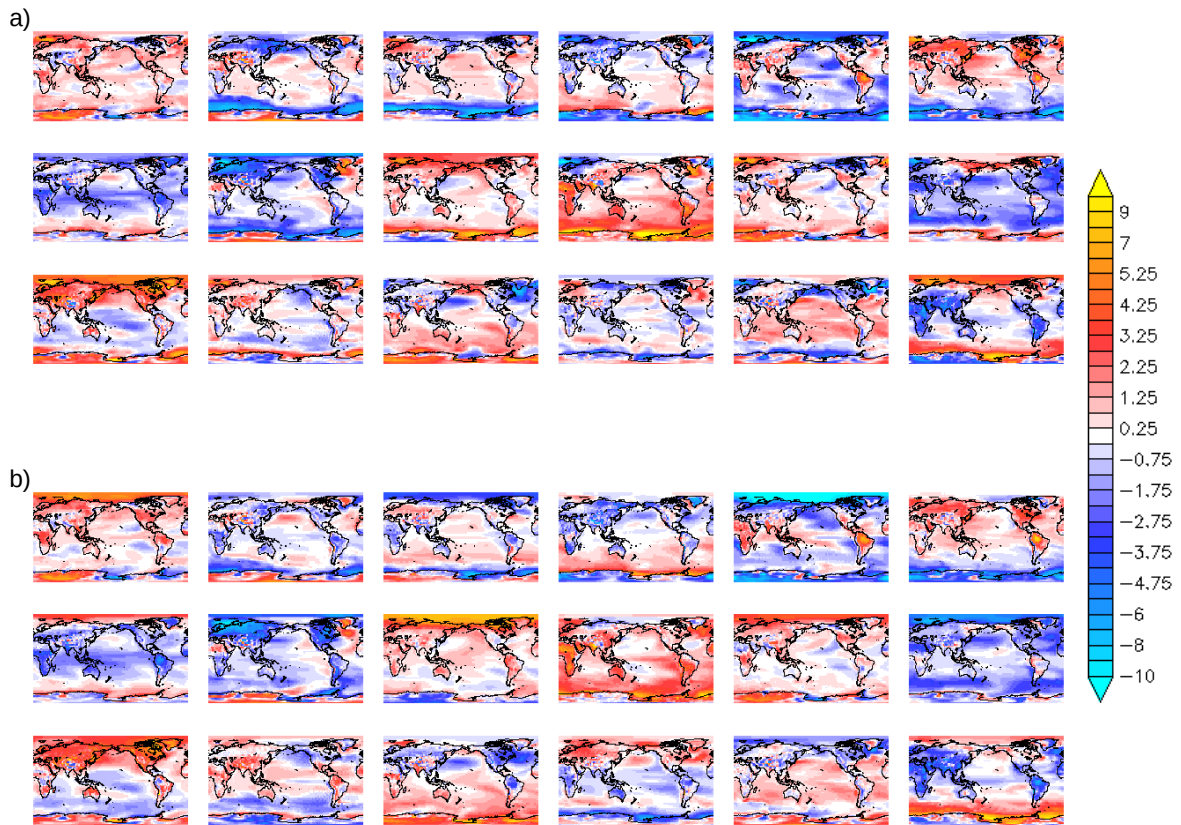

**Fig. S4.** Surface air temperature error patterns (°C) with respect to the ensemble mean for the individual models. a) piControl; b) abrupt4xCO<sub>2</sub>. The color scale is the same for all models and both experiments. Models are ordered from left to right and from top to bottom (model #1 at top left, model #6 at top right, model #18 at bottom right; model numbers as in Figure 1).

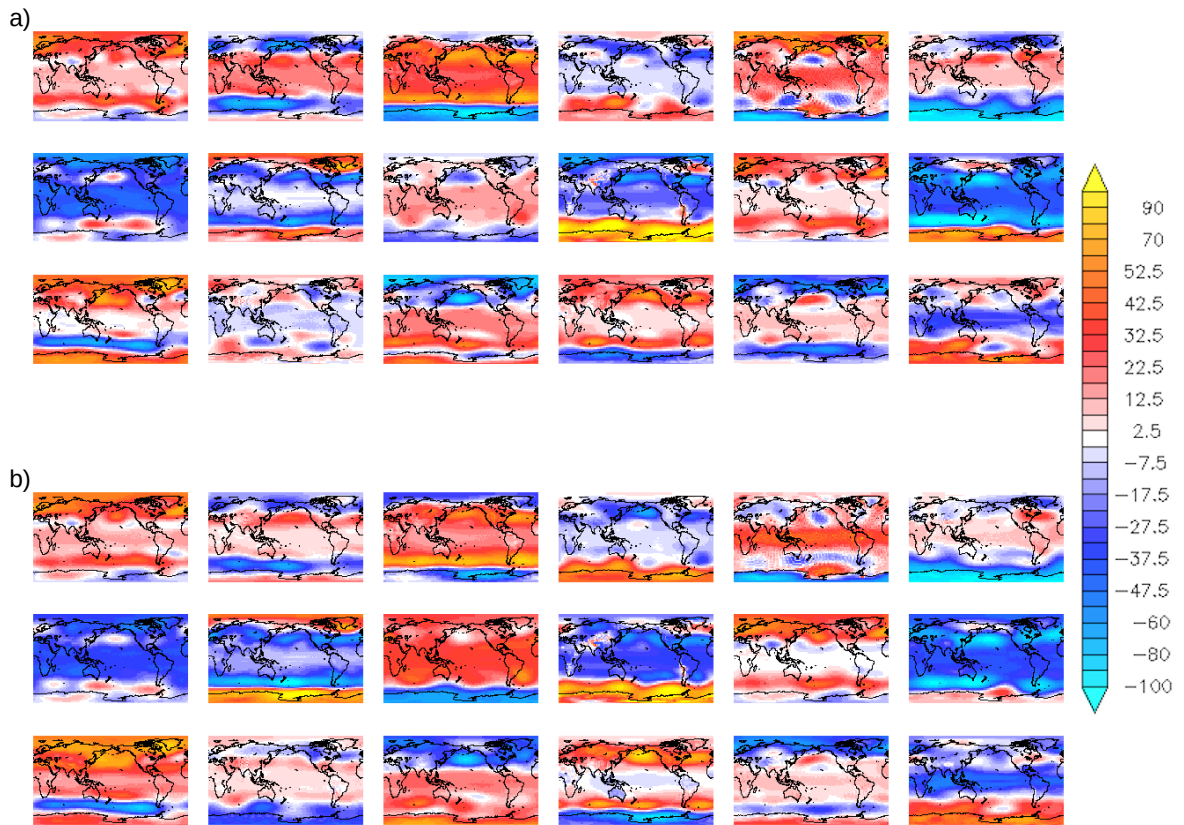

**Fig. S5.** 500 hPa geopotential height error patterns (m) with respect to the ensemble mean for the individual models. a) piControl; b) abrupt4xCO<sub>2</sub>. The color scale is the same for all models and both experiments. Models are ordered from left to right and from top to bottom (model #1 at top left, model #6 at top right, model #18 at bottom right; model numbers as in Figure 1).

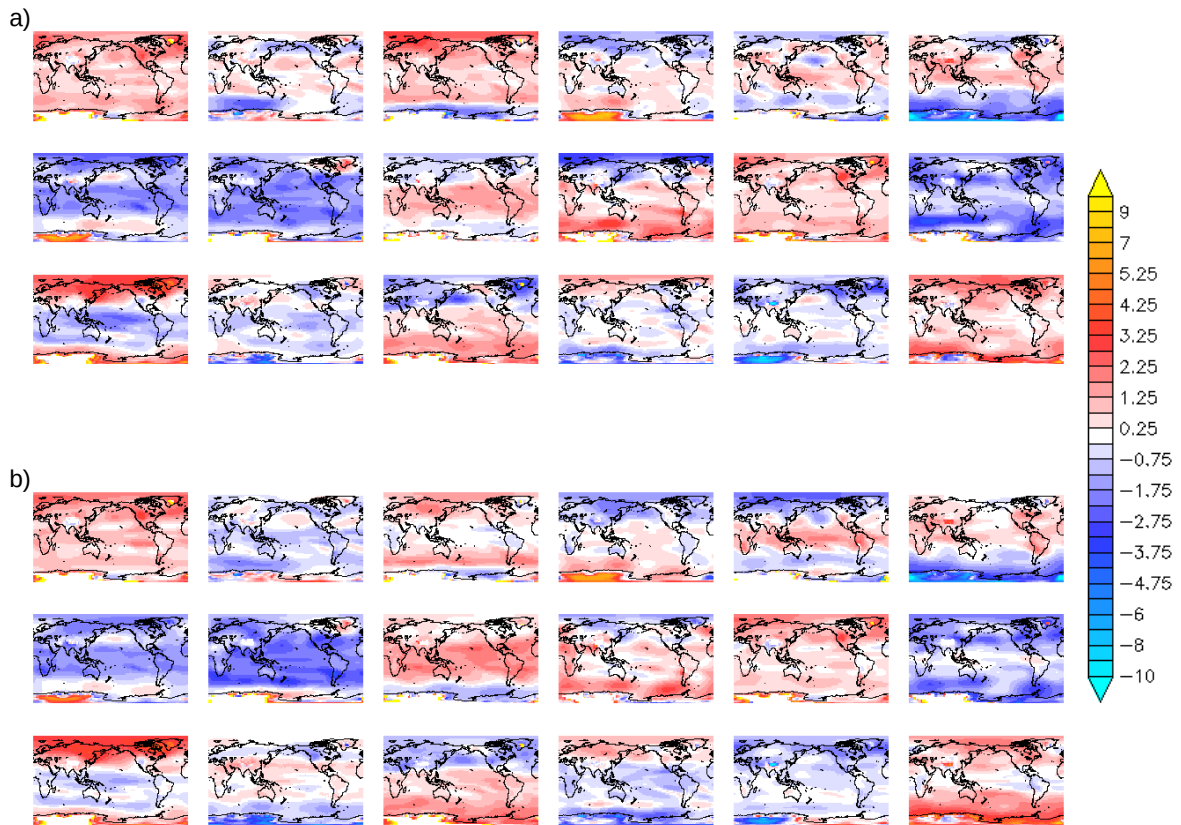

**Fig. S6.** 700 hPa air temperature error pattern (°C) with respect to the ensemble mean for the individual models. a) piControl; b) abrupt4xCO<sub>2</sub>. The color scale is the same for all models and both experiments. Models are ordered from left to right and from top to bottom (model #1 at top left, model #6 at top right, model #18 at bottom right; model numbers as in Figure 1).

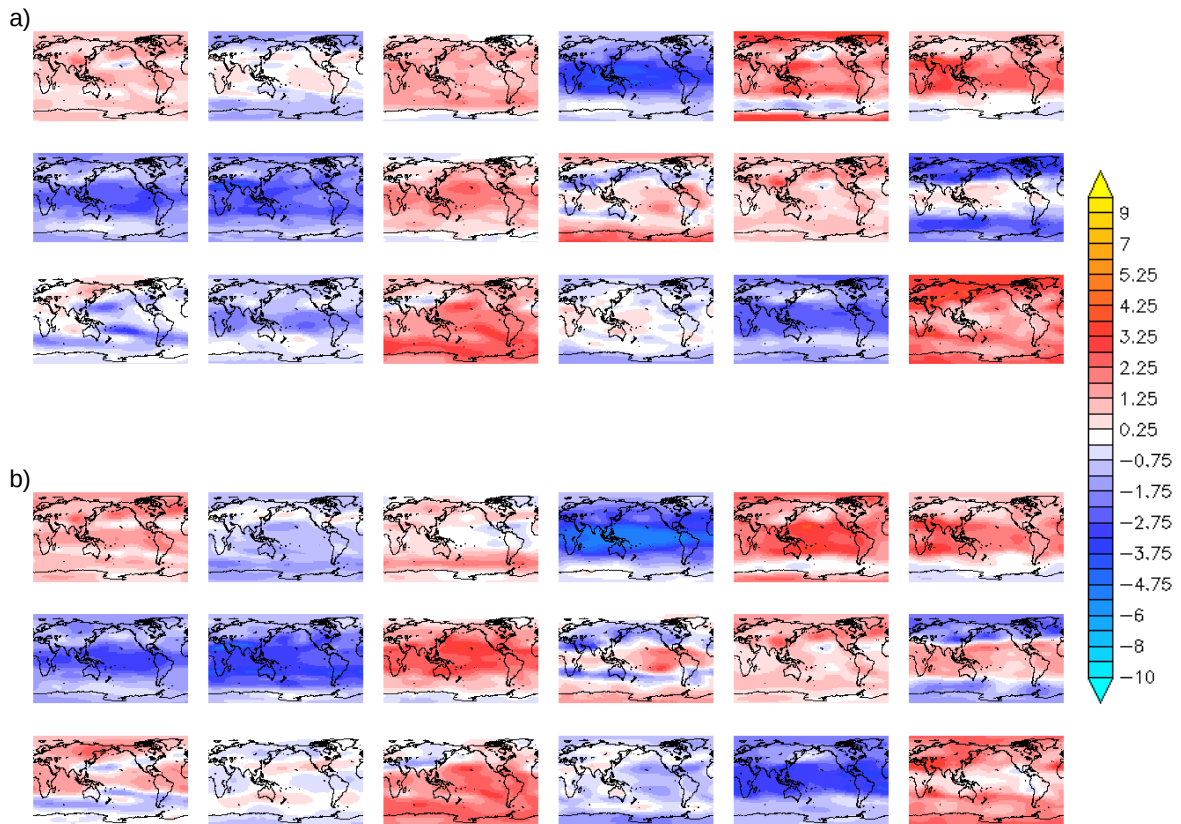

**Fig. S7.** 300 hPa air temperature error pattern (°C) with respect to the ensemble mean for the individual models. a) piControl; b) abrupt4xCO<sub>2</sub>. The color scale is the same for all models and both experiments. Models are ordered from left to right and from top to bottom (model #1 at top left, model #6 at top right, model #18 at bottom right; model numbers as in Figure 1).



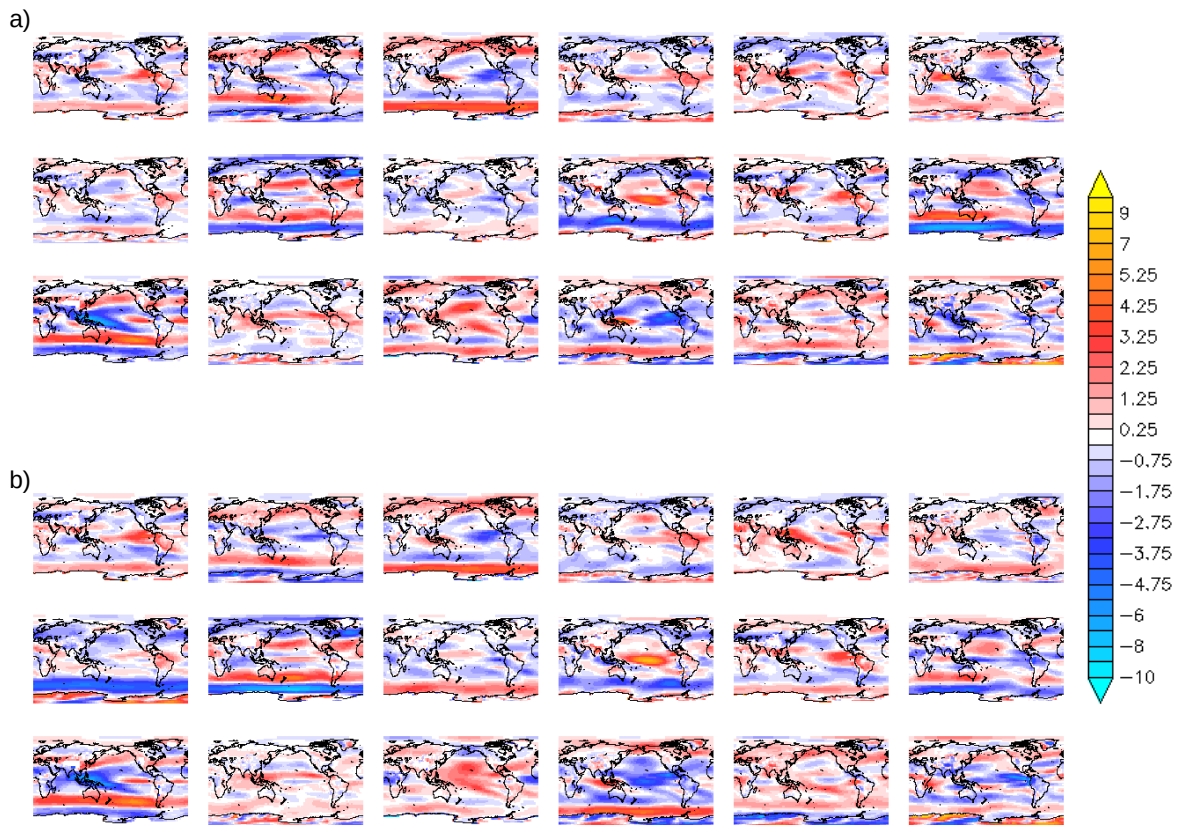

**Fig. S8.** 850 hPa zonal wind error patterns (ms<sup>-1</sup>) with respect to the ensemble mean for the individual models. a) piControl; b) abrupt4xCO<sub>2</sub>. The color scale is the same for all models and both experiments. Models are ordered from left to right and from top to bottom (model #1 at top left, model #6 at top right, model #18 at bottom right; model numbers as in Figure 1).

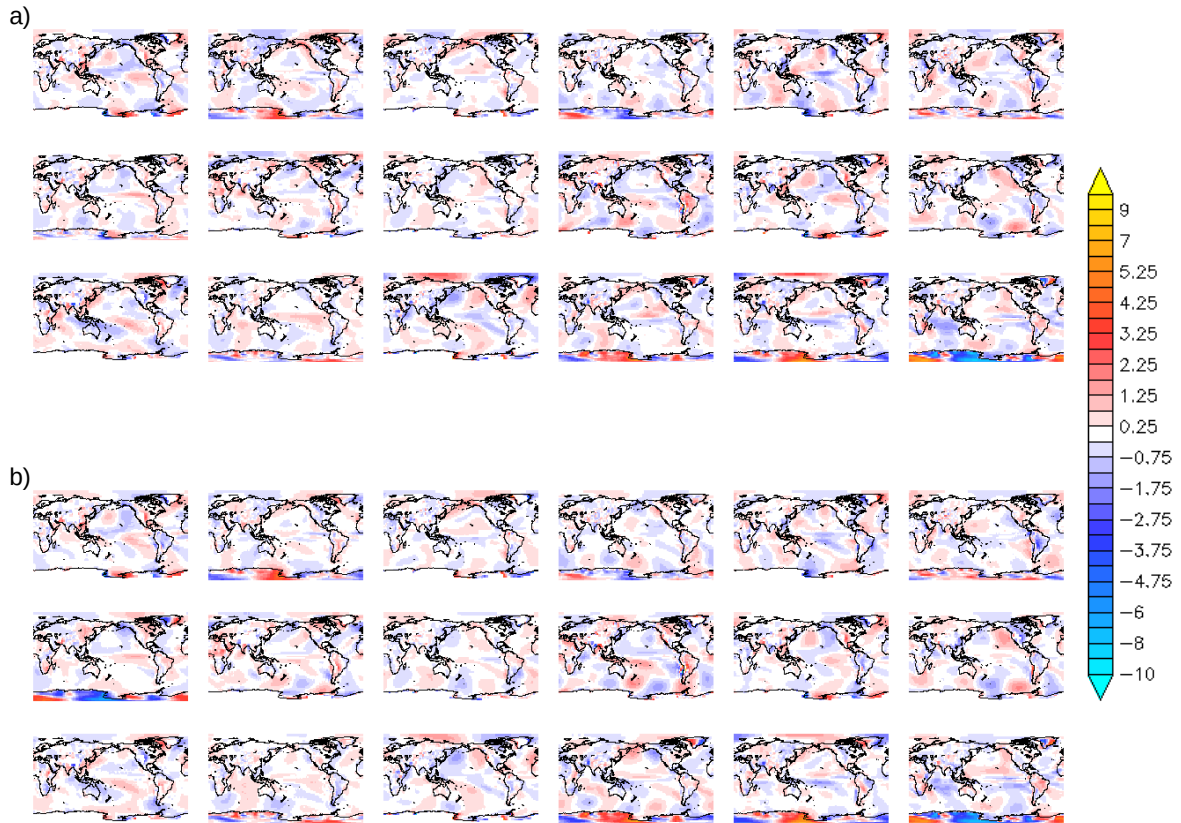

**Fig. S9.** 850 hPa meridional wind error patterns ( $\text{ms}^{-1}$ ) with respect to the ensemble mean for the individual models. a) piControl; b) abrupt4xCO<sub>2</sub>. The color scale is the same for all models and both experiments. Models are ordered from left to right and from top to bottom (model #1 at top left, model #6 at top right, model #18 at bottom right; model numbers as in Figure 1).

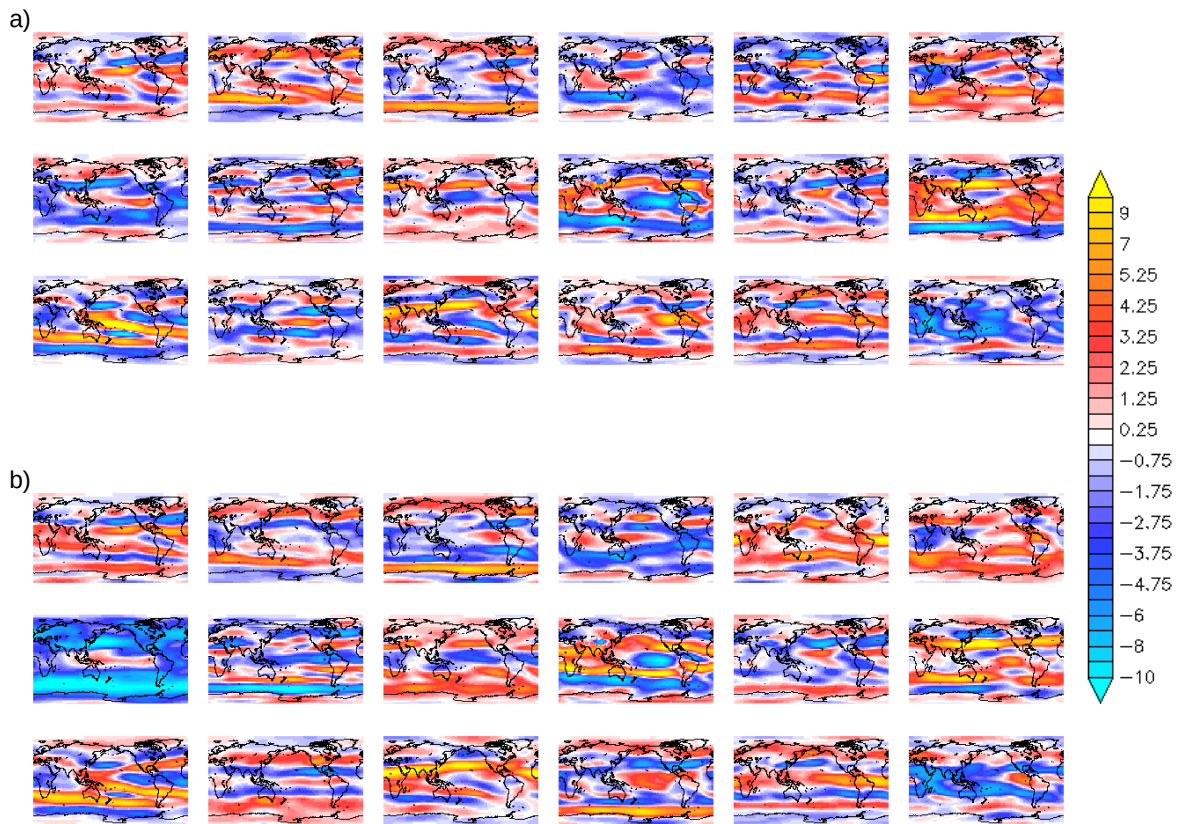

**Fig. S10.** 200 hPa zonal wind error patterns (ms<sup>-1</sup>) with respect to the ensemble mean for the individual models. a) piControl; b) abrupt4xCO<sub>2</sub>. The color scale is the same for all models and both experiments. Models are ordered from left to right and from top to bottom (model #1 at top left, model #6 at top right, model #18 at bottom right; model numbers as in Figure 1).

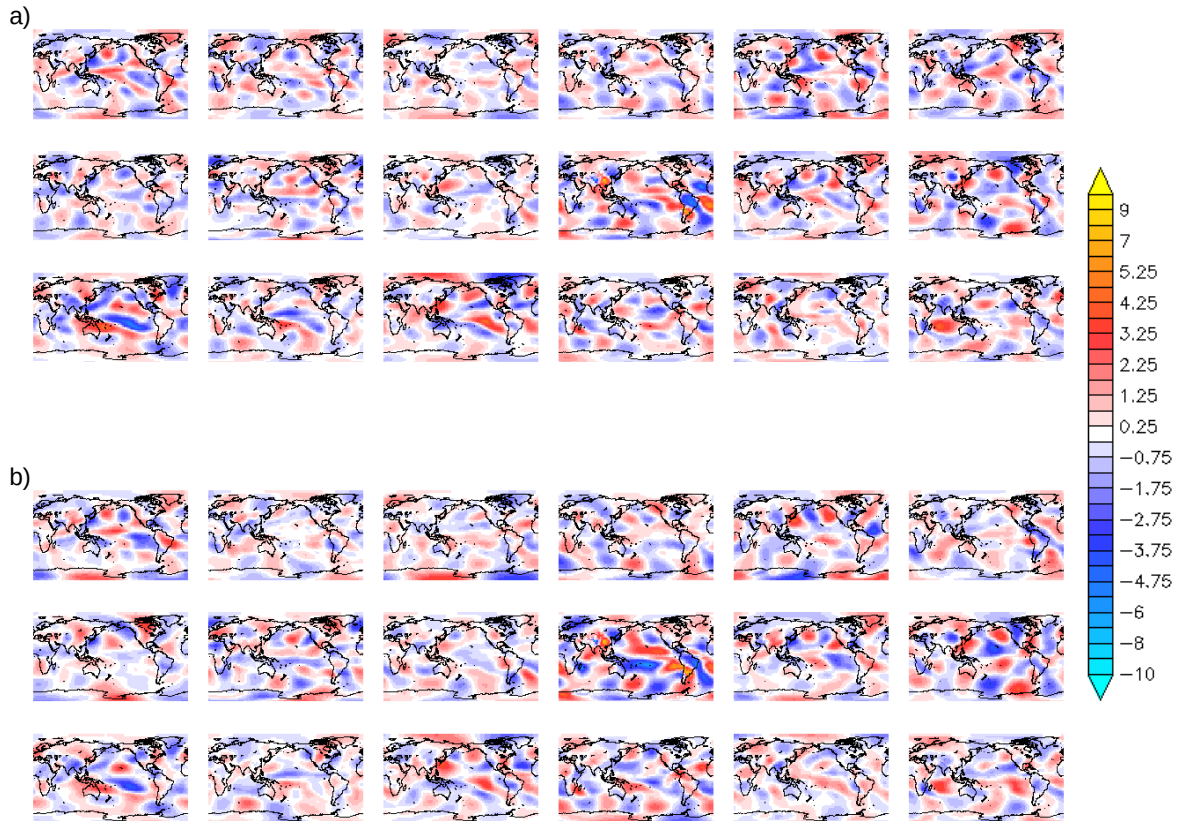

**Fig. S11.** 200 hPa meridional wind error patterns ( $\text{ms}^{-1}$ ) with respect to the ensemble mean for the individual models. a) piControl; b) abrupt4xCO<sub>2</sub>. The color scale is the same for all models and both experiments. Models are ordered from left to right and from top to bottom (model #1 at top left, model #6 at top right, model #18 at bottom right; model numbers as in Figure 1).

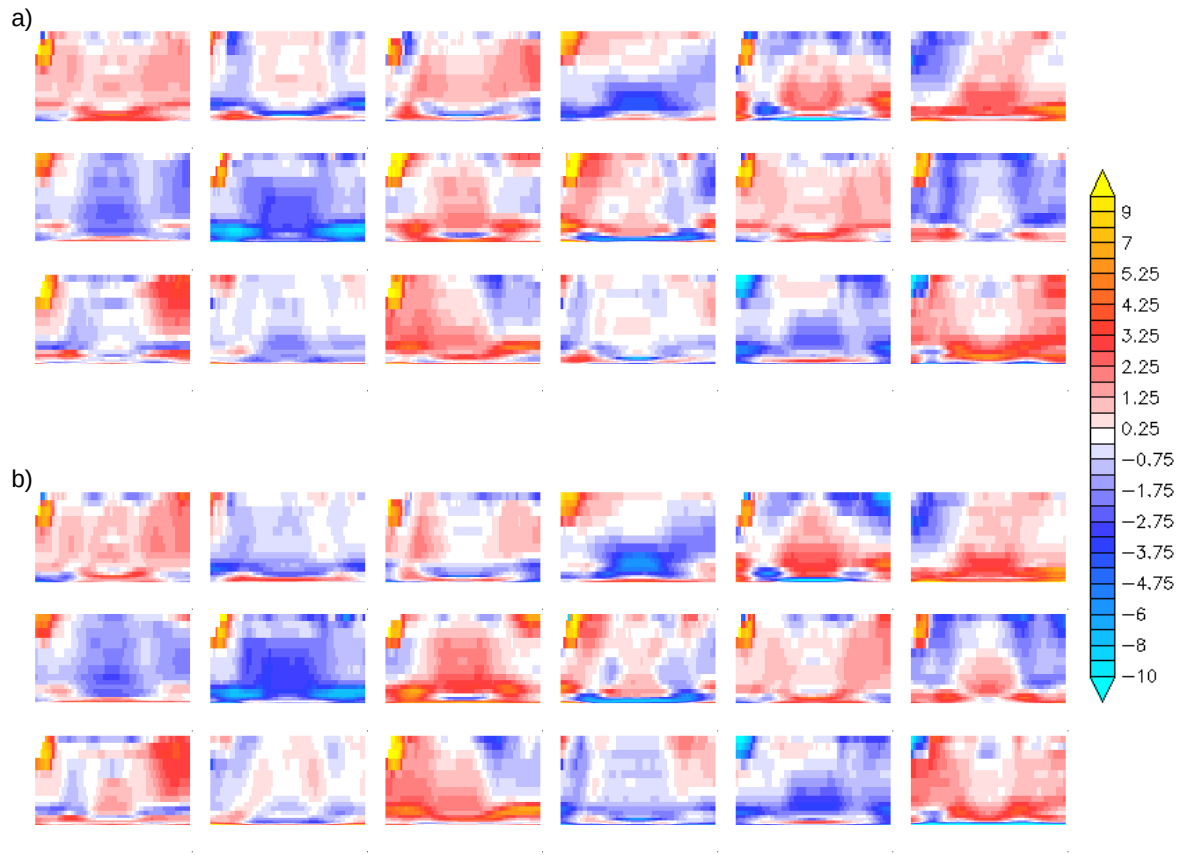

**Fig. S12.** Zonal-mean atmospheric temperature error patterns (°C) with respect to the ensemble mean for the individual models. a) piControl; b) abrupt4xCO<sub>2</sub>. The color scale is the same for all models and both experiments. Models are ordered from left to right and from top to bottom (model #1 at top left, model #6 at top right, model #18 at bottom right; model numbers as in Figure 1).

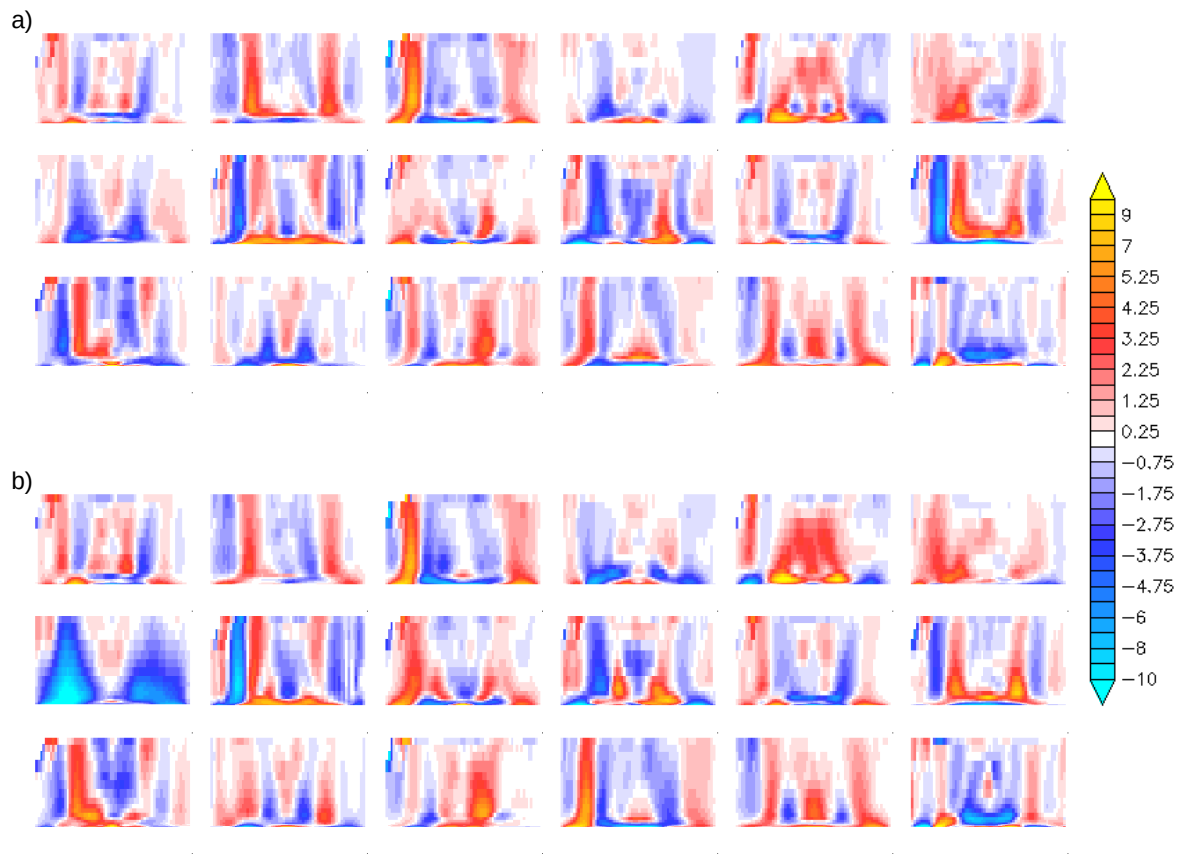

**Fig. S13.** Zonal mean zonal wind error patterns (ms<sup>-1</sup>) with respect to the ensemble mean for the individual models. a) piControl; b) abrupt4xCO<sub>2</sub>. The color scale is the same for all models and both experiments. Models are ordered from left to right and from top to bottom (model #1 at top left, model #6 at top right, model #18 at bottom right; model numbers as in Figure 1).

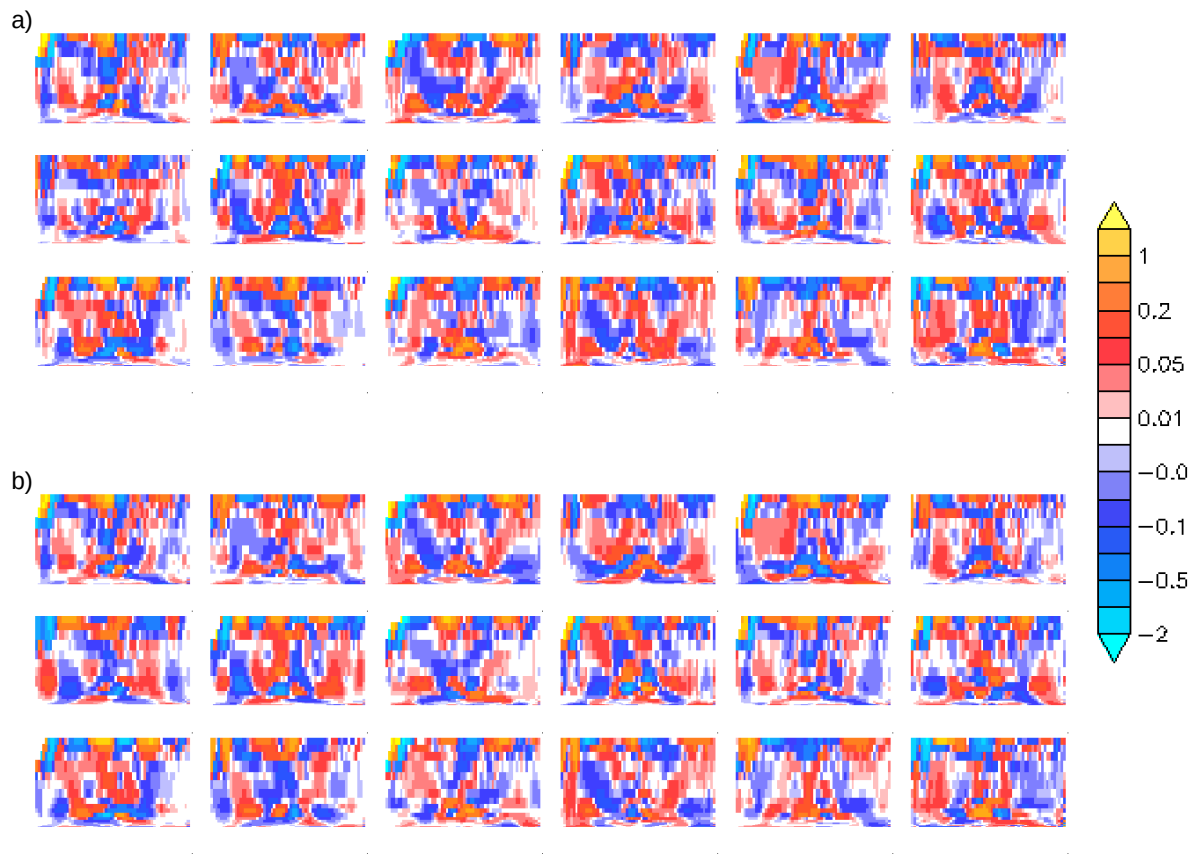

**Fig. S14.** Zonal mean meridional wind error patterns ( $\text{ms}^{-1}$ ) with respect to the ensemble mean for the individual models. a) piControl; b) abrupt4xCO<sub>2</sub>. The color scale is the same for all models and both experiments. Models are ordered from left to right and from top to bottom (model #1 at top left, model #6 at top right, model #18 at bottom right; model numbers as in Figure 1).
